# Supplementary material for: Transcriptional repression and DNA looping associated with a novel regulatory element in the final exon of the lymphotoxin-β gene
Source: PubMed Central journal article supplement — Genes Immun. 2011 Jan 20;12(2):126–35. doi: 10.1038/gene.2010.62 (PMC3049238; doi:10.1038/gene.2010.62), 2011-01-20
Supplement: gene201062x1.pdf [file gene201062x1.pdf]

## Supplemental Figure S1

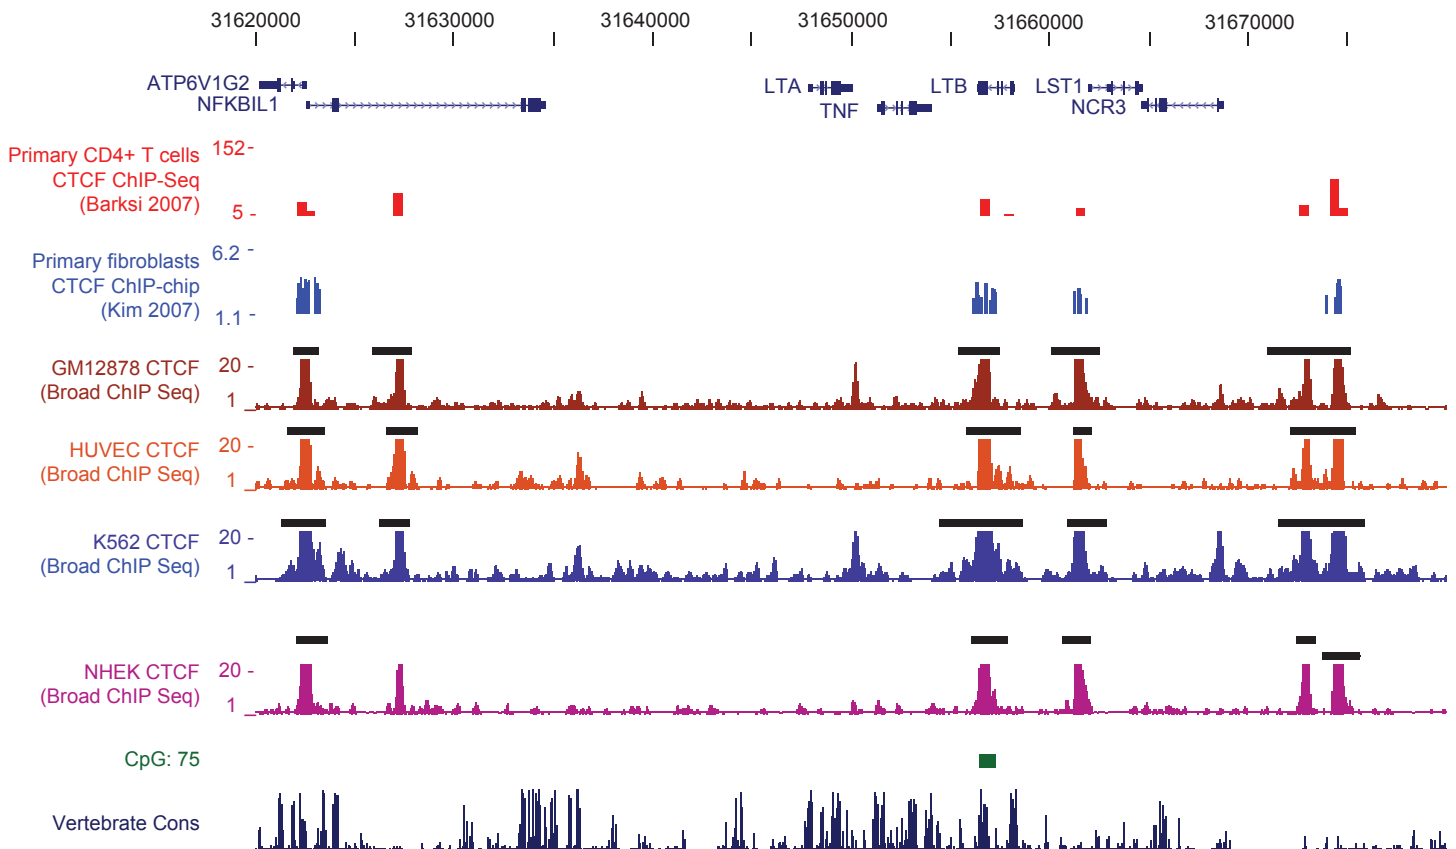

CTCF binding at TNF locus and flanking regions. CTCF binding site data is shown for chr6:31620000-31680000 (hg18) from a number of genome-wide analyses including human CD4+ T cells by ChIP-seq,<sup>1</sup> primary human fibroblasts by ChIP-chip,<sup>2</sup> and the lymphoblastoid cell line GM12878, human umbilical vein endothelial cells (HUVEC), K562 cells and normal human epidermal keratinocytes (NHEK) based on ChIP-seq data from the Broad Institute as part of the ENCODE Histone Modifications analysis. Gene locations and CpG islands are indicated together with vertebrate conservation track downloaded from the UCSC Genome Browser.

### References

1. Barski, A., S. Cuddapah, K. Cui, T. Y. Roh, D. E. Schones, Z. Wang, G. Wei, I. Chepelev, and K. Zhao. High-resolution profiling of histone methylations in the human genome. *Cell* 2007; **129**: 823-37.
2. Kim, T. H., Z. K. Abdullaev, A. D. Smith, K. A. Ching, D. I. Loukinov, R. D. Green, M. Q. Zhang, V. V. Lobanenko, and B. Ren. Analysis of the vertebrate insulator protein CTCF-binding sites in the human genome. *Cell* 2007; **128**: 1231-45.
