# Supplementary material for: Transcriptional repression and DNA looping associated with a novel regulatory element in the final exon of the lymphotoxin-β gene
Source: PubMed Central journal article supplement — Genes Immun. 2011 Jan 20;12(2):126–35. doi: 10.1038/gene.2010.62 (PMC3049238; doi:10.1038/gene.2010.62), 2011-01-20
Supplement: gene201062x2.pdf [file gene201062x2.pdf]

Supplementary Table S1. Probe and primer sequences used

*EMSA probes*

| Name         | Coordinates chr6  | Forward oligo (5' to 3')                                                     | Reverse oligo (5' to 3')                                                    |
|--------------|-------------------|------------------------------------------------------------------------------|-----------------------------------------------------------------------------|
| LTB1         | 31656507-31656546 | agctGAAGTCCACCATATCGGGGTG<br>ACTGATGTTGACGTACACC                             | agctGGTGTACGTCAACATCAGTCACC<br>CCGATATGGTGGACTTC                            |
| YYI          | 31656507-31656527 | agctGAAGTCCACCATATCGGGGTG                                                    | agctCACCCCGATATGGTGGACTTC                                                   |
| CREB         | 31656528-31656546 | agctACTGATGTTGACGTACACC                                                      | agctGGTGTACGTCAACATCAGT                                                     |
| CTCF<br>_LTB | 31656728-31656791 | agctTGACCGAGCGGCCCTGGGGGT<br>CCCCGCCGCCAGGGGGCGCCCGG<br>CCCCGGTAGCCGACGAGACA | agctTGTCTCGTCGGCTACCGGGGCC<br>GGCGCCCCCTGGCGGCGGGGACC<br>CCCAGGGCCGCTCGGTCA |

*Footprinting probes*

| Probe                  | Forward oligo (5' to 3') | Reverse oligo (5' to 3') |
|------------------------|--------------------------|--------------------------|
| chr6:31656372-31656725 | CAAACAGTCTCCTACATTTTTTC  | CTGCGCAGCTCTCTGTACC      |
| chr6:31656634-31656999 | AGCACTGGAGTCACCGTCTC     | GCTAAAAGCCGCACTTCC       |
| chr6:31656946-31657330 | TTGGGAATGCGATCCTAAG      | GCTGCCACCTCATAGGTAA      |

3C

|                     | Primer coordinates chr6 | Sequence (5' to 3')   |
|---------------------|-------------------------|-----------------------|
| Constant for primer | 31656878                | TCGTCGTCTCCCAGCCTA    |
| TaqMan probe        | 31656954                | CATTCCCAAGAGCGCGTCCG  |
| 21496 rev           | 31621519                | TCTAAGGGGAAAGGGGACTG  |
| 26092 rev           | 31626124                | CTTGAGCTGGGGGATGTTAG  |
| 33890 rev           | 31633950                | CTGCTCCTCCTCCTGCTGT   |
| 39106 rev           | 31639133                | TTCATTGAGCTTAAGGCCATC |
| 43924 rev           | 31643967                | ATGCTGGGCATTGTCCTAAG  |
| 45956 rev           | 31646016                | CCCCTTTGCCTTTTATGCTT  |
| 47473 rev           | 31647505                | TGTTTGCCTCTTGTCCAGGT  |
| 48383 rev           | 31648439                | CGGCGGAAGACAGACCTC    |
| 49971 rev           | 31650011                | AGCTGGCTTTCAGAGCCTTT  |
| 51666 rev           | 31651690                | CACTCACCTCTTCCCTCTGG  |
| 53558 rev           | 31653588                | GCTCCCTGGTCTCCAGATTC  |
| 57352 rev           | 31657386                | GGTTTCAGAAGCTGCCAGAG  |
| 58571 rev           | 31658601                | GTCCTAGTCCGGCCCTTG    |
| 61824 rev           | 31661856                | GCCATAATCTGCCTCAGCTC  |
| 64797 rev           | 31664825                | TGAGCCTGATTGTCCTGAGA  |
| 68506 rev           | 31668535                | CTCCTCCACCCAGACCTCAC  |
